# Supplementary material for: Weight gain in anorexia nervosa does not ameliorate the faecal microbiota, branched chain fatty acid profiles, and gastrointestinal complaints
Source: PubMed Central journal article supplement (PMC4882621; doi:10.1038/srep26752), 2016-05-27
Supplement: srep26752-s1.pdf [file srep26752-s1.pdf]

## Supplements 1 to 4

# **Weight gain in anorexia nervosa does not ameliorate the faecal microbiota, branched chain fatty acid profiles, and gastrointestinal complaints**

Isabelle Mack, Ph.D.<sup>1</sup>, Ulrich Cuntz, M.D.<sup>2</sup>, Claudia Grämer, Dipl. Nutritionist<sup>2</sup>, Sabrina Niedermaier, Dipl. Nutritionist<sup>2</sup>, Charlotte Pohl, cand. M.D.<sup>1</sup>, Anderas Schwiertz, Ph.D.<sup>3</sup>, Kurt Zimmermann, Ph.D.<sup>4</sup>, Stephan Zipfel, M.D.<sup>1</sup>, Paul Enck, Ph.D.<sup>1</sup>, John Penders, Ph.D.<sup>5</sup>

<sup>1</sup>Department of Psychosomatic Medicine and Psychotherapy, University Medical Hospital, Tübingen, Germany; <sup>2</sup>Klinik Roseneck, Center for Behavioral Medicine, Prien, Germany; <sup>3</sup>Institute of Microecology, Herborn, Germany; <sup>4</sup>SymbioPharm GmbH, Herborn, Germany; <sup>5</sup>Maastricht University Medical Center, NUTRIM School for Nutrition and Translational Research in Metabolism, Department of Medical Microbiology, Maastricht, The Netherlands

**Supplement 1: Food consumption frequencies of anorexia nervosa patients (AN) before (T1) and after (T2) weight gain in comparison to normal-weight participants (NW).**

| Frequency per month         | ANT1 |        |     | ANT2 |        |     | NW  |        |     | FDR    | FDR    | FDR    |
|-----------------------------|------|--------|-----|------|--------|-----|-----|--------|-----|--------|--------|--------|
|                             | P25  | Median | P75 | P25  | Median | P75 | P25 | Median | P75 |        |        |        |
| Milk                        | 3    | 28     | 56  | 1    | 6      | 28  | 14  | 28     | 84  |        | 0.002  |        |
| Sugar-sweetened beverages   | 0    | 0      | 3   | 0    | 0      | 1   | 1   | 3      | 6   | <0.001 | <0.001 |        |
| Calorie-reduced beverages   | 0    | 6      | 70  | 0    | 1      | 6   | 0   | 0      | 3   | <0.001 |        | 0.001  |
| Fruit juice                 | 0    | 1      | 6   | 0    | 1      | 3   | 5   | 14     | 35  | <0.001 | <0.001 |        |
| Vegetable juice             | 0    | 0      | 0   | 0    | 0      | 0   | 0   | 0      | 0   |        |        |        |
| Water                       | 84   | 168    | 168 | 84   | 126    | 168 | 116 | 126    | 168 |        |        |        |
| Fruit and herbal tea        | 14   | 56     | 126 | 14   | 28     | 56  | 1   | 6      | 24  | <0.001 | <0.001 |        |
| Black tea                   | 0    | 0      | 14  | 0    | 0      | 3   | 0   | 1      | 3   |        |        |        |
| Coffee                      | 3    | 28     | 56  | 3    | 28     | 56  | 3   | 14     | 56  |        |        |        |
| Beer                        | 0    | 0      | 1   | 0    | 0      | 0   | 0   | 1      | 6   | <0.001 | <0.001 | 0.037  |
| Alcohol-free beer           | 0    | 0      | 0   | 0    | 0      | 0   | 0   | 0      | 0   |        |        |        |
| Wine, sparkling wine        | 0    | 0      | 3   | 0    | 0      | 1   | 1   | 3      | 6   | <0.001 | <0.001 |        |
| Cocktails                   | 0    | 0      | 1   | 0    | 0      | 0   | 0   | 1      | 3   | 0.010  |        |        |
| Schnapps                    | 0    | 0      | 1   | 0    | 0      | 0   | 0   | 1      | 1   | 0.029  | 0.004  |        |
| Corn flakes, cacao crispies | 0    | 0      | 1   | 0    | 0      | 1   | 0   | 0      | 3   |        |        |        |
| Muesli, cereals             | 0    | 1      | 6   | 0    | 3      | 14  | 1   | 3      | 6   |        |        |        |
| Whole-meal bread or rolls   | 3    | 28     | 28  | 56   | 56     | 56  | 5   | 14     | 22  |        | <0.001 | <0.001 |
| Brown bread                 | 0    | 1      | 14  | 1    | 22     | 28  | 1   | 6      | 6   |        | 0.017  | 0.042  |
| White bread, toast, rolls   | 0    | 3      | 14  | 6    | 22     | 28  | 3   | 6      | 14  |        | 0.004  | 0.011  |
| Butter                      | 0    | 3      | 25  | 56   | 56     | 56  | 5   | 18     | 56  | 0.01   | <0.001 | <0.001 |
| Cream cheese                | 1    | 6      | 28  | 6    | 14     | 28  | 1   | 6      | 14  |        | <0.001 |        |
| Cheese                      | 1    | 6      | 25  | 14   | 28     | 56  | 5   | 6      | 14  |        | <0.001 | <0.001 |
| Yoghurt, quark              | 3    | 14     | 28  | 14   | 22     | 28  | 3   | 6      | 14  |        | <0.001 |        |
| Honey, marmelade, syrup     | 0    | 6      | 28  | 28   | 28     | 28  | 3   | 3      | 14  |        | <0.001 | <0.001 |
| Hazelnut-chocolate spread   | 0    | 0      | 1   | 0    | 3      | 6   | 0   | 1      | 6   | 0.003  |        | 0.049  |
| Eggs                        | 0    | 1      | 3   | 3    | 6      | 6   | 2   | 3      | 6   | <0.001 |        | 0.002  |
| Poultry                     | 0    | 3      | 6   | 0    | 3      | 6   | 1   | 3      | 6   |        |        |        |
| Doner kebab, hamburger      | 0    | 0      | 0   | 0    | 0      | 0   | 0   | 1      | 3   | <0.001 | <0.001 |        |
| Bratwurst/sausage           | 0    | 0      | 0   | 0    | 0      | 0   | 0   | 1      | 1   | <0.001 | <0.001 |        |
| Meat                        | 0    | 1      | 3   | 0    | 6      | 6   | 1   | 3      | 6   | 0.044  |        | 0.008  |
| Sausage, cold cuts          | 0    | 0      | 1   | 0    | 1      | 3   | 0   | 4      | 14  | <0.001 | 0.004  |        |
| Ham                         | 0    | 1      | 6   | 0    | 6      | 14  | 0   | 3      | 6   |        |        |        |
| Cold fish                   | 0    | 1      | 3   | 0    | 3      | 6   | 0   | 0      | 3   |        |        |        |
| Cooked fish                 | 0    | 3      | 6   | 3    | 6      | 6   | 0   | 2      | 3   |        | <0.001 |        |
| Fresh fruit                 | 6    | 28     | 56  | 14   | 14     | 28  | 14  | 28     | 56  |        |        |        |
| Cooked fruit                | 0    | 0      | 3   | 0    | 3      | 6   | 0   | 1      | 3   |        | 0.002  |        |
| Raw vegetables              | 6    | 28     | 56  | 14   | 14     | 28  | 14  | 22     | 28  |        |        | 0.011  |
| Pulses                      | 0    | 3      | 6   | 1    | 3      | 6   | 1   | 3      | 3   |        |        |        |
| Cooked vegetables           | 6    | 22     | 28  | 14   | 22     | 28  | 3   | 6      | 14  | 0.019  | <0.001 |        |
| Pasta                       | 1    | 3      | 6   | 6    | 6      | 6   | 6   | 6      | 14  | <0.001 |        | 0.049  |
| Rice                        | 0    | 3      | 6   | 6    | 6      | 14  | 3   | 3      | 6   |        | <0.001 | 0.019  |
| Cooked potatoes             | 1    | 3      | 6   | 6    | 6      | 14  | 3   | 3      | 6   |        | <0.001 | 0.001  |
| Fried potatoes              | 0    | 0      | 1   | 0    | 1      | 3   | 0   | 1      | 1   |        |        | 0.002  |
| Chips                       | 0    | 0      | 0   | 0    | 0      | 0   | 1   | 1      | 3   | <0.001 | <0.001 |        |
| Pizza                       | 0    | 0      | 1   | 0    | 1      | 3   | 1   | 1      | 3   | <0.001 | 0.015  |        |
| Cake, muffins               | 0    | 1      | 10  | 3    | 6      | 14  | 3   | 3      | 6   |        | 0.011  |        |
| Biscuits                    | 0    | 0      | 6   | 0    | 3      | 6   | 1   | 3      | 6   |        |        |        |
| Chocolate                   | 0    | 1      | 14  | 3    | 6      | 14  | 3   | 6      | 14  | 0.003  |        |        |
| Sweets                      | 0    | 6      | 28  | 0    | 3      | 18  | 1   | 3      | 14  |        |        |        |
| Ice cream                   | 0    | 1      | 3   | 1    | 3      | 6   | 1   | 3      | 6   | 0.009  |        |        |
| Crisps                      | 0    | 0      | 0   | 0    | 0      | 0   | 0   | 1      | 3   | <0.001 | <0.001 |        |
| Salty biscuits, salt sticks | 0    | 0      | 3   | 0    | 0      | 1   | 0   | 1      | 1   |        | 0.008  |        |
| Nuts                        | 0    | 1      | 4   | 0    | 1      | 3   | 0   | 2      | 3   |        | 0.055  |        |

Legend: The median, P25 and P75 values for the food consumption frequencies within the last 28 days are presented. All p-values were false discovery rate (FDR)-adjusted. A FDR< 0.05 was considered as statistically significant. Annotation: The frequencies provide no information on the portion sizes consumed.

**Supplement 2: Severity scores for gastrointestinal symptoms (GIS) in anorexia nervosa patients (AN) before (T1) and after (T2) weight gain.**

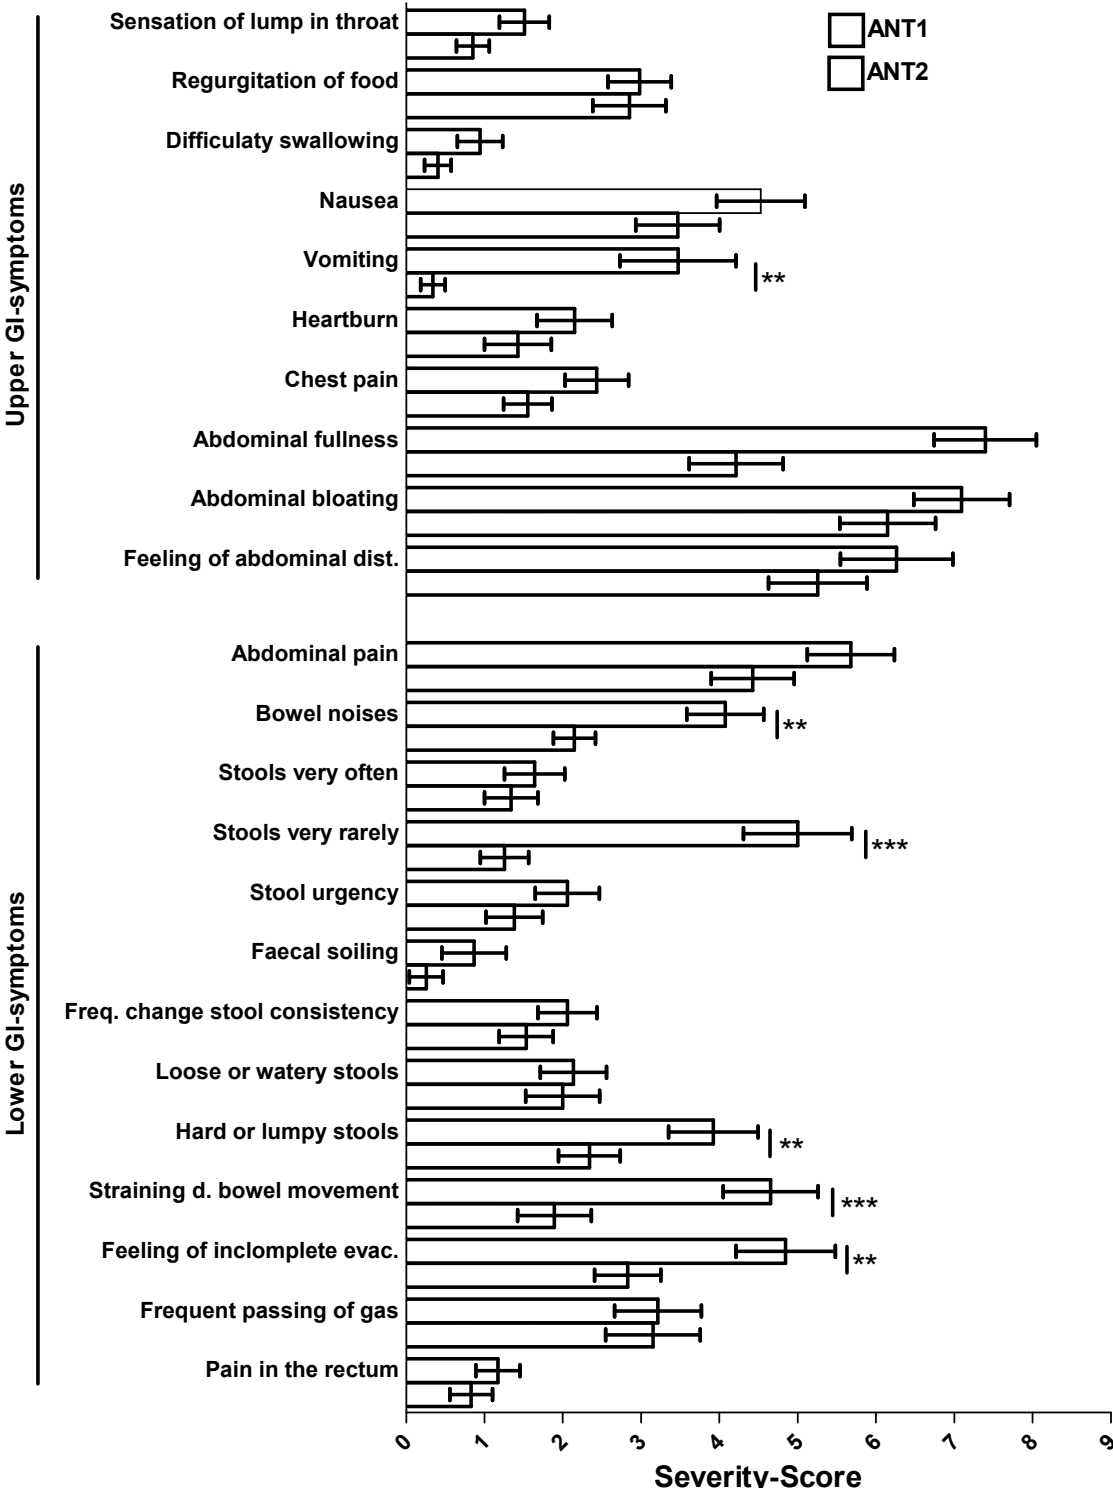

Legend: All differences of GIS between T1 and T2 in AN are given as mean±SE for clarity, although the data are not normally distributed. All p-values were false discovery rate (FDR)-adjusted. A FDR <0.05 was considered as statistically significant. \*\* indicates a FDR <0.01 and \*\*\* indicates a FDR <0.001.

**Supplement 3: Correlations between SCFA and taxa at genus level for anorexia nervosa patients (AN) before (T1) and after (T2) weight gain and normal weight participants (NW).**

| Phylum_Genus                             | Acetate |      |    | Butyrate |      |    | Propionate |      |    | Valerate |      |    | Isovalerate |      |    | Isobutyrate |      |    |
|------------------------------------------|---------|------|----|----------|------|----|------------|------|----|----------|------|----|-------------|------|----|-------------|------|----|
|                                          | ANT1    | ANT2 | NW | ANT1     | ANT2 | NW | ANT1       | ANT2 | NW | ANT1     | ANT2 | NW | ANT1        | ANT2 | NW | ANT1        | ANT2 | NW |
| Actinobacteria_Bifidobacterium           |         |      |    |          |      |    |            |      |    |          |      |    |             |      |    |             |      |    |
| Actinobacteria_Collinsella               |         |      |    |          |      |    |            |      |    |          |      |    |             |      |    |             |      |    |
| Actinobacteria_Eggerthella               |         |      |    |          |      |    |            |      |    |          |      |    |             |      |    |             |      |    |
| Actinobacteria_Gordonibacter             |         |      |    |          |      |    |            |      |    |          |      |    |             |      |    |             |      |    |
| Bacteroidetes_Bacteroides                |         |      |    |          |      |    |            |      |    |          |      |    |             |      |    |             |      |    |
| Bacteroidetes_Barnesiella                |         |      |    |          |      |    |            |      |    |          |      |    |             |      |    |             |      |    |
| Bacteroidetes_Butyricimonas              |         |      |    |          |      |    |            |      |    |          |      |    |             |      |    |             |      |    |
| Bacteroidetes_Paraprevotella             |         |      |    |          |      |    |            |      |    |          |      |    |             |      |    |             |      |    |
| Bacteroidetes_Prevotella                 |         |      |    |          |      |    |            |      |    |          |      |    |             |      |    |             |      |    |
| Bacteroidetes_Alistipes                  |         |      |    |          |      |    |            |      |    |          |      |    |             |      |    |             |      |    |
| Firmicutes_Lactococcus                   |         |      |    |          |      |    |            |      |    |          |      |    |             |      |    |             |      |    |
| Firmicutes_Streptococcus                 |         |      |    |          |      |    |            |      |    |          |      |    |             |      |    |             |      |    |
| Firmicutes_Clostridium_sensu_stricto     |         |      |    |          |      |    |            |      |    |          |      |    |             |      |    |             |      |    |
| Firmicutes_Blautia                       |         |      |    |          |      |    |            |      |    |          |      |    |             |      |    |             |      |    |
| Firmicutes_Clostridium_XIVb              |         |      |    |          |      |    |            |      |    |          |      |    |             |      |    |             |      |    |
| Firmicutes_Coprococcus                   |         |      |    |          |      |    |            |      |    |          |      |    |             |      |    |             |      |    |
| Firmicutes_Dorea                         |         |      |    |          |      |    |            |      |    |          |      |    |             |      |    |             |      |    |
| Firmicutes_Lachnospiracea_incertae_sedis |         |      |    |          |      |    |            |      |    |          |      |    |             |      |    |             |      |    |
| Firmicutes_Roseburia                     |         |      |    |          |      |    |            |      |    |          |      |    |             |      |    |             |      |    |
| Firmicutes_Clostridium_XI                |         |      |    |          |      |    |            |      |    |          |      |    |             |      |    |             |      |    |
| Firmicutes_Anaerotruncus                 |         |      |    |          |      |    |            |      |    |          |      |    |             |      |    |             |      |    |
| Firmicutes_Butyricoccus                  |         |      |    |          |      |    |            |      |    |          |      |    |             |      |    |             |      |    |
| Firmicutes_Clostridium_IV                |         |      |    |          |      |    |            |      |    |          |      |    |             |      |    |             |      |    |
| Firmicutes_Faecalibacterium              |         |      |    |          |      |    |            |      |    |          |      |    |             |      |    |             |      |    |
| Firmicutes_Flavonifractor                |         |      |    |          |      |    |            |      |    |          |      |    |             |      |    |             |      |    |
| Firmicutes_Pseudoflavonifractor          |         |      |    |          |      |    |            |      |    |          |      |    |             |      |    |             |      |    |
| Firmicutes_Ruminococcus                  |         |      |    |          |      |    |            |      |    |          |      |    |             |      |    |             |      |    |
| Firmicutes_Sporobacter                   |         |      |    |          |      |    |            |      |    |          |      |    |             |      |    |             |      |    |
| Firmicutes_Subdoligranulum               |         |      |    |          |      |    |            |      |    |          |      |    |             |      |    |             |      |    |
| Firmicutes_Clostridium_XVIII             |         |      |    |          |      |    |            |      |    |          |      |    |             |      |    |             |      |    |
| Firmicutes_Holdemania                    |         |      |    |          |      |    |            |      |    |          |      |    |             |      |    |             |      |    |
| Firmicutes_Turicibacter                  |         |      |    |          |      |    |            |      |    |          |      |    |             |      |    |             |      |    |
| Firmicutes_Phascolarctobacterium         |         |      |    |          |      |    |            |      |    |          |      |    |             |      |    |             |      |    |
| Firmicutes_Dialister                     |         |      |    |          |      |    |            |      |    |          |      |    |             |      |    |             |      |    |
| Proteobacteria_Oxalobacter               |         |      |    |          |      |    |            |      |    |          |      |    |             |      |    |             |      |    |
| Proteobacteria_Parasutterella            |         |      |    |          |      |    |            |      |    |          |      |    |             |      |    |             |      |    |
| Proteobacteria_Sutterella                |         |      |    |          |      |    |            |      |    |          |      |    |             |      |    |             |      |    |
| Proteobacteria_Bilophila                 |         |      |    |          |      |    |            |      |    |          |      |    |             |      |    |             |      |    |
| Proteobacteria_EscherichiaShigella       |         |      |    |          |      |    |            |      |    |          |      |    |             |      |    |             |      |    |
| Verrucomicrobia_Akkermansia              |         |      |    |          |      |    |            |      |    |          |      |    |             |      |    |             |      |    |

Legend: Spearman correlations between SCFA and bacterial genera that were present in at least 25% of the participants were conducted for all three groups separately. The p-values were false discovery rate (FDR) adjusted. A FDR<0.2 was considered as statistically significant. The table shows the correlation coefficients in bold if FDR<0.05, in bold italics if FDR>0.05 but <0.02 and in normal font if they did not withstand FDR adjustment.

## Supplement 4: The role of laxative use in anorexia nervosa patients (AN) on the intestinal microbiota.

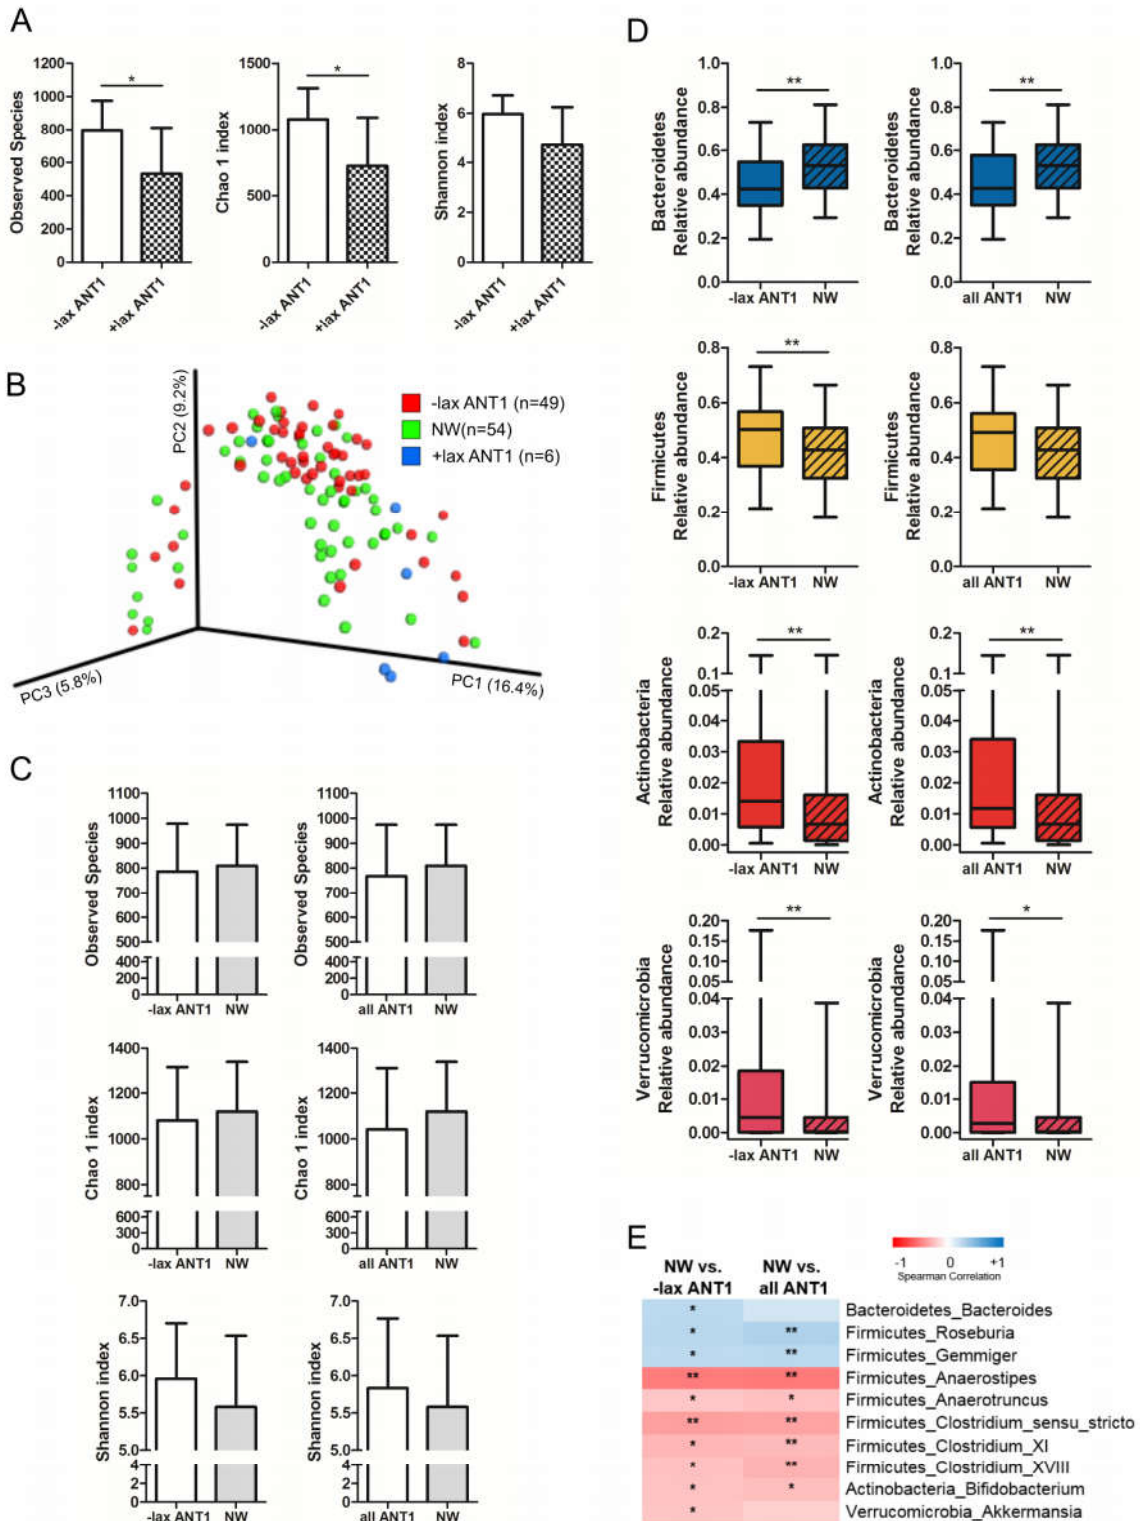

Legend (Suppl.4) **A**: Alpha diversity metrics are presented for AN patients without (-lax) and with a history (+lax) of laxative use before their inpatient stay (T1). **B**: Principal Coordinate Analysis (PCoA) of Bray-Curtis dissimilarities coloured according to -lax ANT1 (green), +lax ANT1 (blue) and normal-weight participants (NW; green). **C-E**: Sensitivity analysis: Alpha diversity metrics (**C**) and taxonomy at phylum (**D**) and genus level (**E**) are presented for NW versus ANT1 participants without a history of laxative use (-lax ANT1). In order to better interpret these sensitivity analysis, the data for NW versus ANT1 including patients with a history of laxative use (all AN, data from figures 3 and 5) are shown for comparison. P-values were adjusted for multiple testing (see methods). \* indicates  $p < 0.05$ , except for D+E where after false discovery rate (FDR) adjustment a  $FDR < 0.15$  was considered as statistically significant in order to account for the beta error and where \* indicates a  $FDR < 0.15$  and \*\* a  $FDR < 0.05$ .
